# Supplementary material
Source: Research Square preprint supplement (doi:10.21203/rs.3.rs-9184670/v1)
Supplement: Supplementary file 1 [file 8350f0ce75acb736fab384cd.docx]

**Supplementary File 2. PRISMA 2020 for Abstracts Checklist**

The Impact of Integrating Generative Artificial Intelligence into Medical Education on Teaching Effectiveness: A Systematic Review and Meta-Analysis of Randomized Controlled Trials

| **Section and topic** | **Item #** | **Checklist item** | **Reported (Yes/No/Partial/NA) / Location in abstract** |
| --- | --- | --- | --- |
| **Title** |  |  |  |
| **Title** | 1 | Identify the report as a systematic review. | Abstract, Line 1: "…A Systematic Review and Meta-Analysis of Randomized Controlled Trials…" |
| **Background** |  |  |  |
| Objectives | 2 | Provide an explicit statement of the main objective(s) or question(s) the review addresses. | Abstract, Background: "…to pool the effects of GenAI-integrated teaching on knowledge and clinical skill scores…" |
| **Methods** |  |  |  |
| Eligibility criteria | 3 | Specify the inclusion and exclusion criteria for the review. | Abstract, Methods: "We included RCTs in which GenAI-integrated medical education was compared against traditional teaching methods." |
| Information sources | 4 | Specify the information sources (e.g. databases, registers) used to identify studies and the date when each was last searched. | Abstract, Methods: "Six databases (PubMed, Cochrane Library, Embase, Web of Science, CNKI, and Wanfang) were searched for the period January 2020 to December 2025." |
| Risk of bias | 5 | Specify the methods used to assess risk of bias in the included studies. | Abstract, Methods: "Risk of bias was evaluated using the Cochrane RoB 2 tool; evidence certainty was graded with GRADE." |
| Synthesis of results | 6 | Specify the methods used to present and synthesise results. | Abstract, Methods: "Random-effects meta-analysis with standardized mean differences (SMD, Hedges' g) and 95% CIs." |
| **Results** |  |  |  |
| Included studies | 7 | Give the total number of included studies and participants and summarise relevant characteristics of studies. | Abstract, Results: "We identified 20 eligible RCTs (1430 participants in total)." |
| Synthesis of results | 8 | Present results for main outcomes, preferably indicating the number of included studies and participants for each. If meta-analysis was done, report the summary estimate and confidence/credible interval. If comparing groups, indicate the direction of the effect (i.e. which group is favoured). | Abstract, Results: "Post-intervention knowledge scores were higher in GenAI groups (SMD = 0.99, 95% CI: 0.49–1.49, P = 0.001; k = 11; I² = 86.7%)…clinical skill scores (SMD = 1.09, 95% CI: 0.81–1.38, P < 0.001; k = 8; I² = 41.0%)." |
| **Discussion** |  |  |  |
| Limitations of evidence | 9 | Provide a brief summary of the limitations of the evidence included in the review (e.g. study risk of bias, inconsistency and imprecision). | Abstract, Conclusion: Implicitly addressed through noting evidence certainty "sits at low to moderate" and calling for "well-powered, multicenter RCTs with longer follow-up." |
| Interpretation | 10 | Provide a general interpretation of the results and important implications. | Abstract, Conclusion: "Using GenAI in medical education seems to lead to moderate-to-large gains in knowledge and clinical skills; the knowledge improvements appear to carry over beyond the teaching period itself." |
| **Other** |  |  |  |
| Funding | 11 | Specify the primary source of funding for the review. | Declarations, Funding: "[To be inserted]" |
| Registration | 12 | Provide the register name and registration number. | Methods, Section 2.1: "The review protocol was prospectively registered with PROSPERO." |

From: Page MJ, McKenzie JE, Bossuyt PM, et al. The PRISMA 2020 statement: an updated guideline for reporting systematic reviews. BMJ 2021;372:n71. doi: 10.1136/bmj.n71

This abstract checklist retains the same items as those included in the PRISMA for Abstracts statement published in 2013, but has been revised to make the wording consistent with the PRISMA 2020 statement and includes a new item recommending authors specify the methods used to present and synthesise results (item #6).
