# Supplementary material
Source: Research Square preprint supplement (doi:10.21203/rs.3.rs-9184670/v1)
Supplement: Supplementary file 2 [file da630264ed6e147ecc5b34c2.docx]

**Supplementary File 1. PRISMA 2020 Checklist**

The Impact of Integrating Generative Artificial Intelligence into Medical Education on Teaching Effectiveness: A Systematic Review and Meta-Analysis of Randomized Controlled Trials

| **Section and Topic** | **Item #** | **Checklist Item** | **Location where item is reported** |
| --- | --- | --- | --- |
| TITLE |  |  |  |
| Title | 1 | Identify the report as a systematic review. | Title, Page 1 |
| ABSTRACT |  |  |  |
| Abstract | 2 | See the PRISMA 2020 for Abstracts checklist. | Abstract, Pages 1–2; See Supplementary File 2 |
| INTRODUCTION |  |  |  |
| Rationale | 3 | Describe the rationale for the review in the context of existing knowledge. | Introduction, Section 1, Paragraphs 1–5 |
| Objectives | 4 | Provide an explicit statement of the objective(s) or question(s) the review addresses. | Introduction, Section 1, Paragraph 5 |
| METHODS |  |  |  |
| Eligibility criteria | 5 | Specify the inclusion and exclusion criteria for the review and how studies were grouped for the syntheses. | Methods, Section 2.2 Eligibility Criteria |
| Information sources | 6 | Specify all databases, registers, websites, organisations, reference lists and other sources searched or consulted to identify studies. Specify the date when each source was last searched or consulted. | Methods, Section 2.3 Information Sources and Search Strategy |
| Search strategy | 7 | Present the full search strategies for all databases, registers and websites, including any filters and limits used. | Methods, Section 2.3; Supplementary Materials (search strings) |
| Selection process | 8 | Specify the methods used to decide whether a study met the inclusion criteria of the review, including how many reviewers screened each record and each report retrieved, whether they worked independently, and if applicable, details of automation tools used in the process. | Methods, Section 2.4 Study Selection |
| Data collection process | 9 | Specify the methods used to collect data from reports, including how many reviewers collected data from each report, whether they worked independently, any processes for obtaining or confirming data from study investigators, and if applicable, details of automation tools used in the process. | Methods, Section 2.5 Data Extraction |
| Data items | 10a | List and define all outcomes for which data were sought. Specify whether all results that were compatible with each outcome domain in each study were sought, and if not, the methods used to decide which results to collect. | Methods, Section 2.6 Outcome Classification |
|  | 10b | List and define all other variables for which data were sought. Describe any assumptions made about any missing or unclear information. | Methods, Section 2.5 Data Extraction |
| Study risk of bias assessment | 11 | Specify the methods used to assess risk of bias in the included studies, including details of the tool(s) used, how many reviewers assessed each study and whether they worked independently, and if applicable, details of automation tools used in the process. | Methods, Section 2.7 Risk of Bias Assessment |
| Effect measures | 12 | Specify for each outcome the effect measure(s) used in the synthesis or presentation of results. | Methods, Section 2.8 Statistical Analysis |
| Synthesis methods | 13a | Describe the processes used to decide which studies were eligible for each synthesis. | Methods, Section 2.8 Statistical Analysis |
|  | 13b | Describe any methods required to prepare the data for presentation or synthesis, such as handling of missing summary statistics, or data conversions. | Methods, Section 2.8 Statistical Analysis |
|  | 13c | Describe any methods used to tabulate or visually display results of individual studies and syntheses. | Results, Figures 3–5; Tables 2–3 |
|  | 13d | Describe any methods used to synthesize results and provide a rationale for the choice(s). If meta-analysis was performed, describe the model(s), method(s) to identify the presence and extent of statistical heterogeneity, and software package(s) used. | Methods, Section 2.8 Statistical Analysis |
|  | 13e | Describe any methods used to explore possible causes of heterogeneity among study results. | Methods, Section 2.8 Statistical Analysis (subgroup analyses, meta-regression) |
|  | 13f | Describe any sensitivity analyses conducted to assess robustness of the synthesized results. | Methods, Section 2.8 Statistical Analysis (sensitivity analyses) |
| Reporting bias assessment | 14 | Describe any methods used to assess risk of bias due to missing results in a synthesis. | Methods, Section 2.8 (Egger's test, trim-and-fill); Results, Section 3.9 |
| Certainty assessment | 15 | Describe any methods used to assess certainty (or confidence) in the body of evidence for an outcome. | Methods, Section 2.9 Certainty of Evidence (GRADE) |
| RESULTS |  |  |  |
| Study selection | 16a | Describe the results of the search and selection process, from the number of records identified in the search to the number of studies included in the review, ideally using a flow diagram. | Results, Section 3.1 Study Selection; Figure 1 |
|  | 16b | Cite studies that might appear to meet the inclusion criteria, but which were excluded, and explain why they were excluded. | Results, Section 3.1 Study Selection |
| Study characteristics | 17 | Cite each included study and present its characteristics. | Results, Section 3.2 Study Characteristics; Table 1 |
| Risk of bias in studies | 18 | Present assessments of risk of bias for each included study. | Results, Section 3.3 Risk of Bias; Figure 2 |
| Results of individual studies | 19 | For all outcomes, present, for each study: (a) summary statistics for each group and (b) an effect estimate and its precision, ideally using structured tables or plots. | Results, Sections 3.4–3.5; Figures 3–4; Table 2 |
| Results of syntheses | 20a | For each synthesis, briefly summarise the characteristics and risk of bias among contributing studies. | Results, Sections 3.4–3.5 Primary and Secondary Outcomes |
|  | 20b | Present results of all statistical syntheses conducted. If meta-analysis was done, present for each the summary estimate and its precision and measures of statistical heterogeneity. If comparing groups, describe the direction of the effect. | Results, Sections 3.4–3.5; Table 2; Figures 3–4 |
|  | 20c | Present results of all investigations of possible causes of heterogeneity among study results. | Results, Sections 3.6 Subgroup Analyses; 3.8 Meta-Regression; Table 3 |
|  | 20d | Present results of all sensitivity analyses conducted to assess the robustness of the synthesized results. | Results, Section 3.7 Sensitivity Analyses |
| Reporting biases | 21 | Present assessments of risk of bias due to missing results for each synthesis assessed. | Results, Section 3.9 Publication Bias; Figure 5 |
| Certainty of evidence | 22 | Present assessments of certainty (or confidence) in the body of evidence for each outcome assessed. | Results, Section 3.10 Certainty of Evidence (GRADE); Table 4 |
| DISCUSSION |  |  |  |
| Discussion | 23a | Provide a general interpretation of the results in the context of other evidence. | Discussion, Section 4, Paragraphs 1–5 |
|  | 23b | Discuss any limitations of the evidence included in the review. | Discussion, Section 4, Paragraph 5 (Limitations) |
|  | 23c | Discuss any limitations of the review processes used. | Discussion, Section 4, Paragraph 6 (Limitations) |
|  | 23d | Discuss implications of the results for practice, policy, and future research. | Discussion, Section 4; Section 5 Conclusion |
| OTHER INFORMATION |  |  |  |
| Registration and protocol | 24a | Provide registration information for the review, including register name and registration number, or state that the review was not registered. | Methods, Section 2.1 Study Registration and Reporting Guidelines |
|  | 24b | Indicate where the review protocol can be accessed, or state that a protocol was not prepared. | Methods, Section 2.1 Study Registration and Reporting Guidelines |
|  | 24c | Describe and explain any amendments to information provided at registration or in the protocol. | N/A – No amendments were made |
| Support | 25 | Describe sources of financial or non-financial support for the review, and the role of the funders or sponsors in the review. | Declarations, Funding |
| Competing interests | 26 | Declare any competing interests of review authors. | Declarations, Conflicts of Interest |
| Availability of data, code and other materials | 27 | Report which of the following are publicly available and where they can be found: template data collection forms; data extracted from included studies; data used for all analyses; analytic code; any other materials used in the review. | Data Availability Statement |

From: Page MJ, McKenzie JE, Bossuyt PM, et al. The PRISMA 2020 statement: an updated guideline for reporting systematic reviews. BMJ 2021;372:n71. doi: 10.1136/bmj.n71
